# Supplementary material for: Therapeutic nanoparticles penetrate leaves and deliver nutrients to agricultural crops
Source: PubMed Central journal article supplement (PMC5958142; doi:10.1038/s41598-018-25197-y), 2018-05-17
Supplement: 41598_2018_25197_MOESM1_ESM.pdf [file 41598_2018_25197_MOESM1_ESM.pdf]

# **Therapeutic nanoparticles penetrate leaves and deliver nutrients to agricultural crops**

Avishai Karny,<sup>1</sup> Assaf Zinger,<sup>1</sup> Ashima Kajal,<sup>1</sup> Janna Shainsky-Roitman<sup>1</sup> and Avi Schroeder<sup>1,\*</sup>

<sup>1</sup>Department of Chemical Engineering, Technion – Israel Institute of Technology, Haifa 32000, Israel

## **SUPPLEMENTARY INFORMATION**

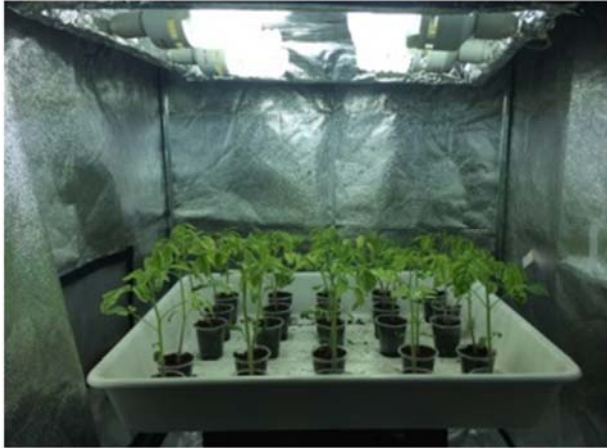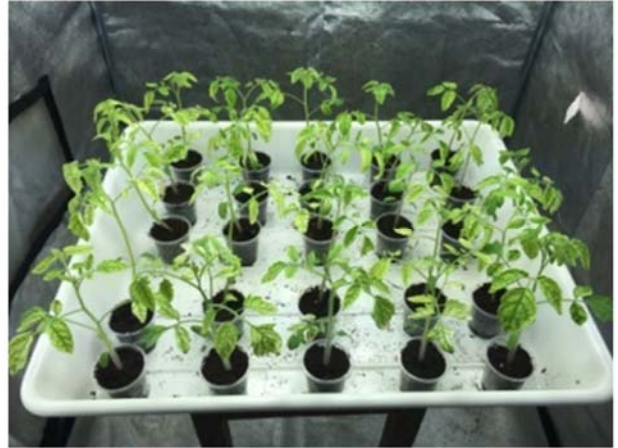

**Supplementary 1. Tomato plants grown in micronutrient-poor growth substrate prior to treatment.** At 4 weeks of age (5 fully grown leaves) plants show acute deficiencies characterized by severe epinasty and chlorosis in between leaf veins, symptoms attributed to Magnesium and Iron deficiencies.

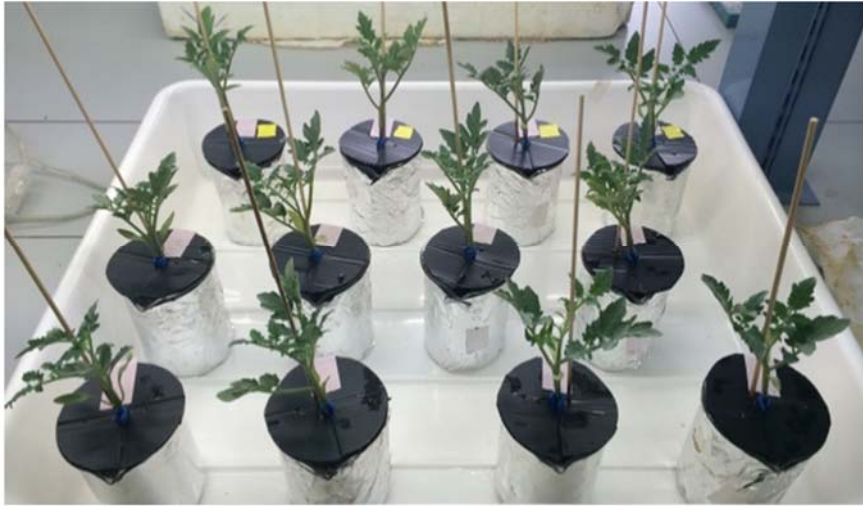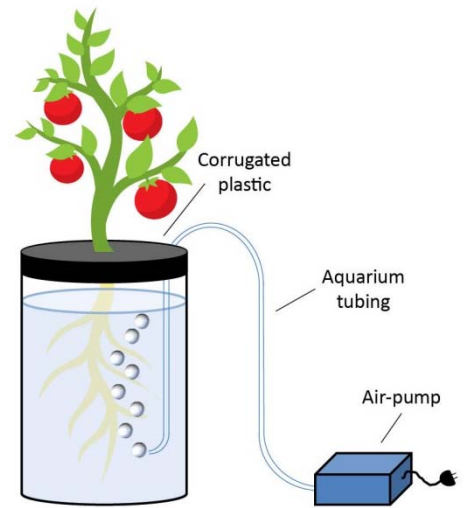

**Supplementary 2. Hydroponic system setup.** (left) Tomato plant seedlings were grown in nursery and transferred to 250 ml beakers containing full Hoagland solution for a 5 day adjustment to hydroponic media, later to be changed to Fe-deficient Hoagland solution. (right) Each plant setup included continuous adequate air pumping throughout the experiment.
